# Supplementary material
Source: bioRxiv or medRxiv preprint supplement (https://www.biorxiv.org/highwire/filestream/118112/field_highwire_adjunct_files/1/389197-2.pdf)
Supplement: Supplementary file [file 389197-2.pdf]

**A**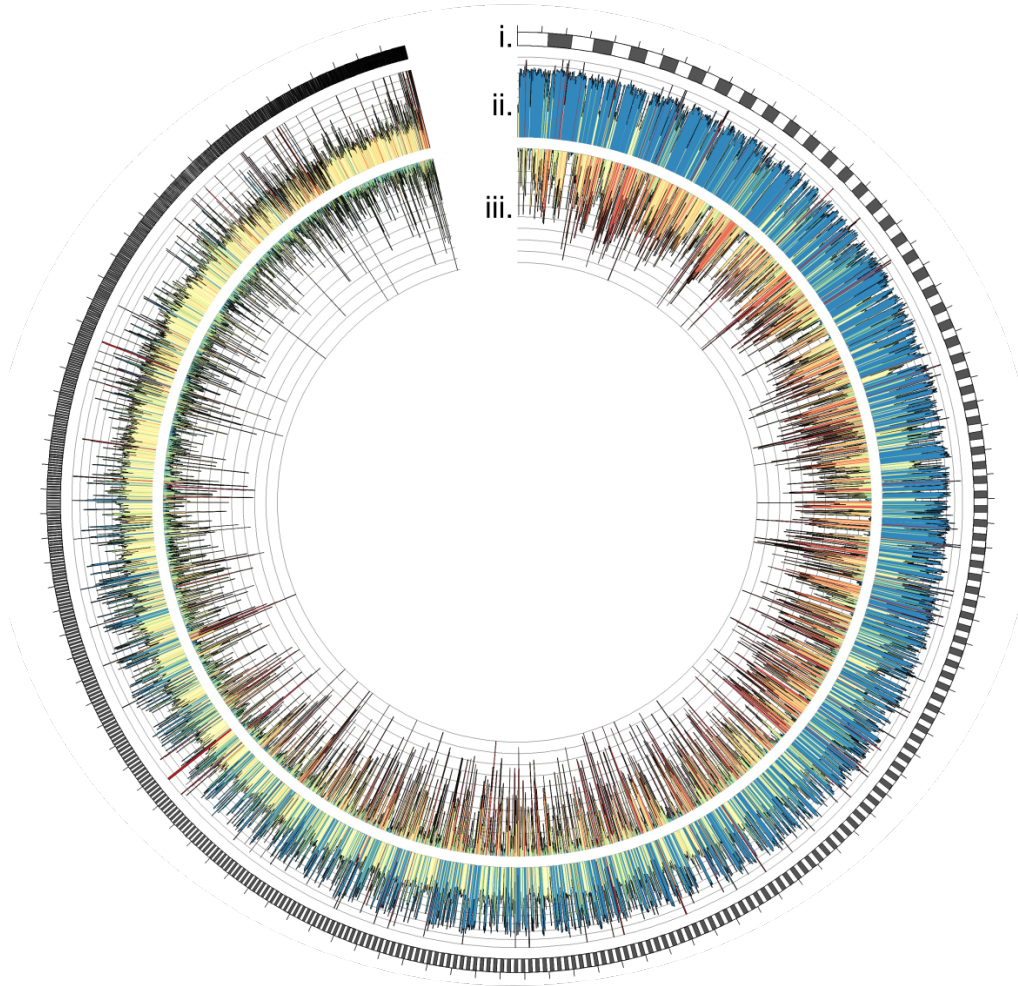**B**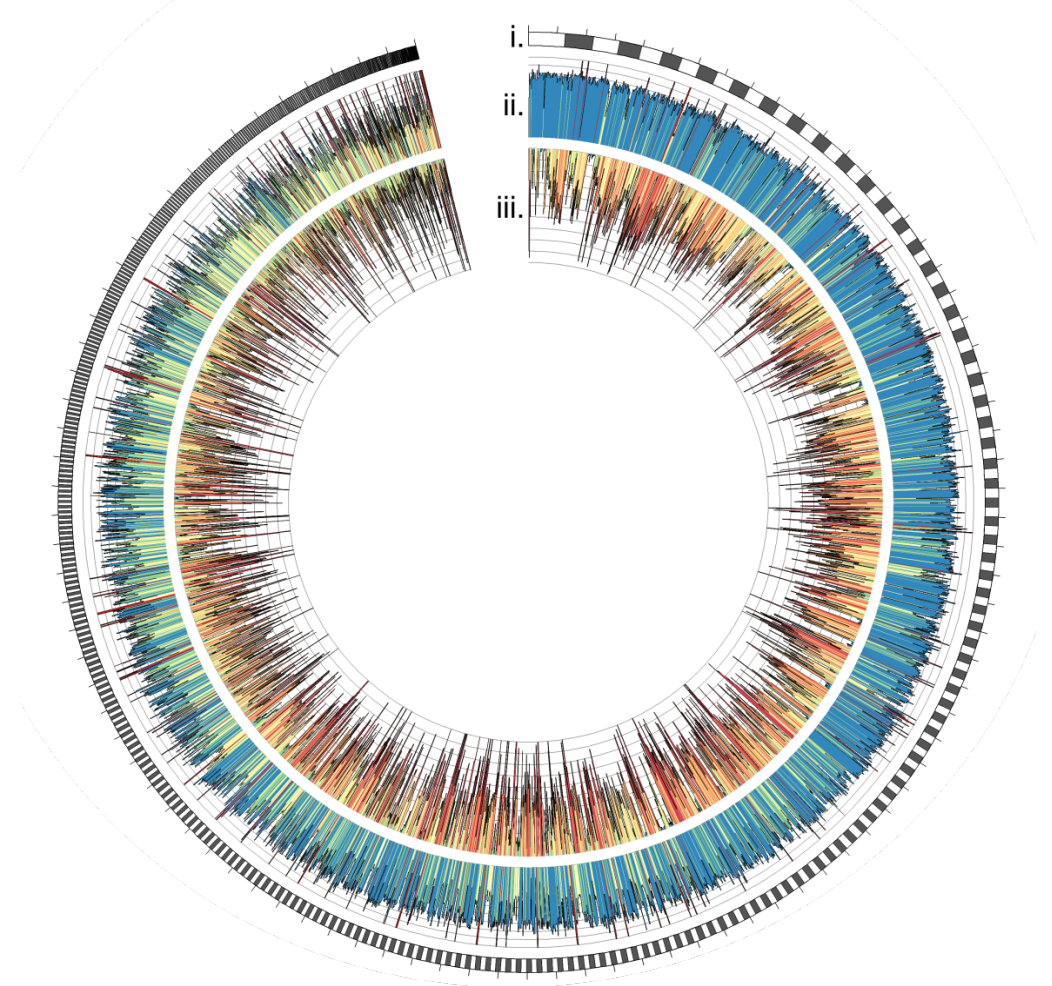

**S2 Fig: Redundant primary contig reduction.** Circular representations of **A)** FALCON Unzip Chardonnay assembly and **B)** the same assembly after curation. Tracks are: length-ordered contigs **(i)**, read-depth of mapped Illumina paired end reads **(ii)** and heterozygous SNPs density **(iii)**
